# Supplementary material
Source: MDPI journal article supplement (https://www.mdpi.com/2073-4441/13/1/29)
Supplement: s1 [file s1]

**1. Mann-Kendall mutation and significance test of the inflow and outflow of Erhai Lake from 1990 to 2019.**

**Table S1** M-K test of the inflow and outflow of Erhai Lake

| <b>Variable</b> | <b>Z</b> | <b>Mutation year</b> | <b>Trend</b> | <b>Significance</b> |
|-----------------|----------|----------------------|--------------|---------------------|
| Inflow          | 1.40     | 2004                 | Downtrend    | Not significant     |
| Outflow         | 1.33     | 2004                 | Downtrend    | Not significant     |

Note: When the absolute value of Z is greater than 1.96, it means that the trend has passed the significance level test of 95%.

**2. Mann-Kendall mutation and significance test of the water level of Erhai Lake from 1990 to 2019.**

**Table S2** Mann-Kendall test of the water level of Erhai Lake

| <b>Variable</b> | <b>Z</b> | <b>Mutation year</b> | <b>Trend</b> | <b>Significance</b> |
|-----------------|----------|----------------------|--------------|---------------------|
| Water level     | 3.96     | 2005                 | Uptrend      | Significant         |

**3. PCA method was used to extract the eigenvalues and variance contribution rate of each principal component that affect the water level change of Erhai Lake in different periods.**

**Table S3 The eigenvalues and variance contribution rates of principal components in different periods**

| <b>Period</b> | <b>Component</b> | <b>Eigenvalue coefficient</b> | <b>Contribution percentage of variance (%)</b> | <b>Cumulative contribution percentage (%)</b> |
|---------------|------------------|-------------------------------|------------------------------------------------|-----------------------------------------------|
| 1990–2004     | 1                | 2.85                          | 47.495                                         | 47.495                                        |
|               | 2                | 2.33                          | 38.826                                         | 86.321                                        |
| 2005–2019     | 1                | 2.591                         | 43.188                                         | 43.188                                        |
|               | 2                | 2.074                         | 34.562                                         | 77.75                                         |
| 1990–2019     | 1                | 2.85                          | 47.495                                         | 47.495                                        |
|               | 2                | 2.33                          | 38.826                                         | 86.321                                        |

Note: Extract the components with eigenvalue coefficient greater than 1 in this study.
